# Supplementary material for: Effect of the Gas6 c.834+7G>A Polymorphism and the Interaction of Known Risk Factors on AMD Pathogenesis in Hungarian Patients
Source: PLoS One. 2012 Nov 29;7(11):e50181. doi: 10.1371/journal.pone.0050181 (PMC3510257; doi:10.1371/journal.pone.0050181)
Supplement: Table S1 — Genotype distribution of the analyzed polymorphisms in patients and controls. (XLSX) [file pone.0050181.s001.xlsx]

## Sheet: Table 1
Table 1
		Dry	Wet	Controls	p
		N=67	N=213	N=106
	Female N (%)	34 (50.7)	125 (58.7)	53 (50.0)	0.2569
	Male N (%)	33 (49.3)	88 (41.3)	53 (50.0)	0.2569
	Age (year, mean±SD)	75.4 (11.5)	76.0 ( 7.3)	79.1 ( 6.1)	0.0047
	Smoking (packyear, mean± SD)	12.0 (20.1)	11.2 (19.8)	11.4 (21.9)	0.7601
	BMI (mean±SD)	27.3 ( 4.5)	27.3 ( 4.4)	27.6 ( 4.7)	0.8306
	Hypertonia N (%)	45 (67.2)	159 (75.0)	81 (79.4)	0.2135
	DVT N (%)	7 (10.4)	15 ( 7.1)	15 (14.9)	0.0928
	AMI N (%)	6 ( 9.0)	19 ( 9.0)	7 ( 7.4)	0.9054
	Outdoor profession N (%)	22 (32.8)	39 (18.5)	38 (38.4)	0.0004
	Cataract surgery N (%)	21 (31.3)	48 (22.6)	73 (70.2)	0

## Sheet: Genotype distribution
		dry AMD cases		wet Amd Cases		all AMD cases		Controls
	genotype	n	frequency	n	frequency	n	frequency	n	frequency
ApoE	3/3	49	0.731343	148	0.704762	197	0.711191	71	0.669811
	3/4 + 4/4	11	0.164179	34	0.161905	45	0.162455	16	0.150943
	2/3 + 2/2	7	0.104478	24	0.114286	31	0.111913	17	0.160377
	2/4	0	0	4	0.0190476	4	0.0144404	2	0.0188679
	total	67		210		277		106
CFH p.Y402H	TT	23	0.343284	35	0.171569	58	0.214022	42	0.403846
rs1061170	TC	24	0.358209	89	0.436275	113	0.416974	51	0.490385
	CC	20	0.298507	80	0.392157	100	0.369004	11	0.105769
	total	67		204		271		104
LOC387715 p.A69S	GG	25	0.373134	45	0.21327	70	0.251799	49	0.471154
rs10490924	GT	31	0.462687	95	0.450237	126	0.453237	50	0.480769
	TT	11	0.164179	71	0.336493	82	0.294964	5	0.0480769
	total	67		211		278		104
HTRA1	TT	25	0.378788	47	0.22381	72	0.26087	50	0.480769
rs11200638	TC	31	0.469697	94	0.447619	125	0.452899	50	0.480769
	CC	10	0.151515	69	0.328571	79	0.286232	4	0.0384615
	total	66		210		276		104
C3 p.R102G	CC	34	0.515152	118	0.564593	152	0.552727	66	0.622642
rs2230199	CG	28	0.424242	81	0.38756	109	0.396364	37	0.349057
	GG	4	0.0606061	10	0.0478469	14	0.0509091	3	0.0283019
	total	66		209		275		106
CFI	CC	16	0.246154	45	0.21327	61	0.221014	19	0.179245
rs10033900	CT	32	0.492308	110	0.521327	142	0.514493	56	0.528302
	TT	17	0.261538	56	0.265403	73	0.264493	31	0.292453
	total	65		211		276		106
FXIII p.Val34Leu	GG	39	0.58209	118	0.559242	157	0.564748	48	0.45283
rs5985	GT	25	0.373134	73	0.345972	98	0.352518	47	0.443396
	TT	3	0.0447761	20	0.0947867	23	0.0827338	11	0.103774
	total	67		211		278		106
GAS6 c.834+7G>A	GG	27	0.415385	96	0.466019	123	0.453875	36	0.346154
rs8191974	GA	28	0.430769	89	0.432039	117	0.431734	55	0.528846
	AA	10	0.153846	21	0.101942	31	0.114391	13	0.125
	total	65		206		271		104
Mertk I1a	GG	25	0.390625	76	0.368932	101	0.374074	37	0.355769
rs86016	GA	30	0.46875	97	0.470874	127	0.47037	51	0.490385
	AA	9	0.140625	33	0.160194	42	0.155556	16	0.153846
	total	64		206		270		104
Mertk I1b	CC	40	0.615385	129	0.617225	169	0.616788	60	0.571429
rs17835605	CT	15	0.230769	65	0.311005	80	0.291971	39	0.371429
	TT	10	0.153846	15	0.0717703	25	0.0912409	6	0.0571429
	total	65		209		274		105
Mertk I1c	AA	60	0.923077	179	0.848341	239	0.865942	91	0.866667
rs10496440	AC	5	0.0769231	31	0.146919	36	0.130435	14	0.133333
	CC	0	0	1	0.00473934	1	0.00362319	0	0
	total	65		211		276		105
Mertk I4	AA	45	0.703125	149	0.712919	194	0.710623	69	0.657143
rs7573344	AG	19	0.296875	56	0.267943	75	0.274725	33	0.314286
	GG	0	0	4	0.0191388	4	0.014652	3	0.0285714
	total	64		209		273		105

## Sheet: Table 3
					OR (95%CI)	p
	ApoE	3/3	vs	3/4 + 4/4
		3/3	vs	2/3 + 2/2
	CFI rs10033900	CC	vs	CT + TT
		CC	vs	TT
	FXIII Val34Leu rs5985	GG	vs	GT + TT
		GG	vs	TT
	Mertk I1a (G/A)	GG	vs	GA + AA
		GG	vs	AA
	Mertk I1b (C/T)	CC	vs	CT + TT
		CC	vs	TT
	Mertk I1c (A/C)	AA	vs	AC + CC
		AA	vs	CC
	Mertk I4 (A/G)	AA	vs	AG + GG
		AA	vs	GG
	ezek lesznek a negatívok

## Sheet: Table 3 modified
					OR (95%CI)	p
	ApoE	3/4 + 4/4	vs	3/3	1.01 (0.54; 1.91)	0.9665
		2/3 + 2/2	vs	3/3	0.66 (0.34; 1.26)	0.2062
	CFI rs10033900	CC	vs	CT + TT	1.30 (0.73; 2.30)	0.3699
		CC	vs	TT	1.36 (0.70; 2.65)	0.3607
	FXIII Val34Leu rs5985	GT	vs	GG	0.64 (0.40; 1.03)	0.069
		TT	vs	GG	0.64 (0.29; 1.41)	0.2657
	Mertk I1a (G/A)	GA + AA	vs	GG	0.92 (0.58; 1.48)	0.7424
		AA	vs	GG	0.96 (0.48; 1.91)	0.9113
	Mertk I1b (C/T)	TT	vs	CC + CT	1.66 (0.66; 4.18)	0.2789
		TT	vs	CC	1.48 (0.58; 3.78)	0.4135
	Mertk I1c (A/C)	AC	vs	AA	0.98 (0.50; 1.90)	0.9502
		CC	vs	AA	NA (shortage of CC genotype)
	Mertk I4 (A/G)	AG + GG	vs	AA	0.78 (0.48; 1.26)	0.312
		GG	vs	AA	0.47 (0.10; 2.17)	0.3367
	ezek lesznek a negatívok
